# Supplementary material for: Spring flowering habit in field pennycress (Thlaspi arvense) has arisen multiple independent times
Source: PubMed Central journal article supplement (PMC6508777; doi:10.1002/pld3.97), 2018-11-15

**A**

```

      20                40                60                80
Thlaspi arvense Ta1.0_26225 FRIGIDA  MAFRNGSLI PRLGYAN- YSSVREEQPSL LPSPATI I PRLHQRHQSEQRERGE FPAVITRTET INKETF I GOSKHPQFLKSIDE 79
Eutrema salsugineum XP006402021 FRIGIDA MAFRNGSM I PTRGYSHHPSTIEKPS- - - SPAT I PRLHQRHQSEQRERGE FPAVITRTET INKETF I GOSKHPQFLKSIDE 76
Bochera stricta AFJ66199 FRIGIDA MAFRNGSLI PLGLAYAN- YPPTMEAQPS- - - TAAI PRLHQRH LERRRGE FPAVETDSBTVEI I SIGH SKQPQFLKSIDD 75
Arabidopsis arenosa AA292551 FRIGIDA MA- - - - - - - N- YPPTVAAQSS- - - TAAI PL LHO- - - SERRRGLPAVVESTAMEI I SIGOSKQPFLKSIDE 59
Arabidopsis lyrata ABY51887 FRIGIDA MA- - - - - - - N- YPPTVAAQSS- - - TAAI PL LHOQRHQSEQRERGE FPAVVESTAMEI I SIGOSKQPFLKSIDE 62
Arabidopsis thaliana AHL43028 FRIGIDA MS- - - - - - - N- YPPTVAAQPT- - - TTANPLL QRHQSEQRREL PKIVETEST SMD I I GOSKQPFLKSIDE 61
Camelina sativa XP_010426308 FRIGIDA M- - - - - - - I PALAYAN- YPPSMFQPS- - - TAAI PRL- - - QSERRRQLPAVVED- - - QIT I GOSKQPFLKSIDD 59
AFV28956 Capsella FRIGIDA MAFRNGSM I PGV- - - - - - - AQPS- - - TAAI PRLHQHQSEQRREL GELPAVFEIET- - - H I TIGESKQPEF FKSIDD 61

      100                120                140                160
Thlaspi arvense Ta1.0_26225 FRIGIDA  LTAFSAAVDFAFKRQYDD LDKHMDYI ENAIESKLSNGIETIAAASSS FHSSQS- SPNN- - - VVFAAVVCOSPKETT- - - 150
Eutrema salsugineum XP006402021 FRIGIDA LAKFSAAFDFAFKRHDD LDKHMDI ENAIESKLSNGVD- - - DSSSHSPEHDASH- - - ETIAATVCPPPPPEA- - - 143
Bochera stricta AFJ66199 FRIGIDA LAAFSAAVDYFKRQFDLQKHI ESINAIESKLSNGVYLA- S NFHQP- LSPNNASGETI TR- VTVSQSSQPEA- - - 148
Arabidopsis arenosa AA292551 FRIGIDA LAAFSVAVEAFKRQFDLQKHI ESINAIESKLSNGADLAA- S NFHQP- LSPNNASVETT- VVSVSQSSQPEA- - - 133
Arabidopsis lyrata ABY51887 FRIGIDA LAAFSVAVEAFKRQFDLQKHI ESINAIESKLSNGADLAA- S NFHQP- LSPNNVS VETT- VVSVSQSSQPEA- - - 136
Arabidopsis thaliana AHL43028 FRIGIDA LAAFSVAVETFKRQFDLQKHI ESINAIDSKLESNGVLAARNNNFHQP- LSPNNVS VETT- VTVSQSSEI- - - 134
Camelina sativa XP_010426308 FRIGIDA LAAFSAAVDFAFKRQFDLQKHI ESINAIDTTLKLSNGVDIAA- SDFHQP- LSPNNASVETT VTVSQSSQDPVPAIIS 137
AFV28956 Capsella FRIGIDA LAAFSVAVEAFKRQFDLQKHI ESVENAIDSEKLSNGVDIAA- S SNFHP- LSPNNASVETT- VTVSQSSQPEA- - - 134

      180                200                220                240
Thlaspi arvense Ta1.0_26225 FRIGIDA  - - - - - ETVPET- - - SNKPEGORLCC- - - SKGLRKYIYSNI SDRAKLMKEIPEALKLAKPAKFLVLECIGK FYLOGR 214
Eutrema salsugineum XP006402021 FRIGIDA - - - - - ETAPPEMITNDKAEGRRLCEMSCSKGLRKYIYANI SDRAKLMEEI PAGLKLAKPAKFLVLECIGK FYLOGR 214
Bochera stricta AFJ66199 FRIGIDA - - - - - ETVPET- - - SNKPEGERLCELMCSKGLRKYIYANI SDRAKLMEEI PSALKLAKPAKFLVLECIGK FYLOGR 216
Arabidopsis arenosa AA292551 FRIGIDA - - - - - ETVPET- - - SNKTFEGERLCELMCSKGLRKYIYANI SDRAKLMEEI PSALKLAKPAKFLVLECIGK FYLOGR 201
Arabidopsis lyrata ABY51887 FRIGIDA - - - - - ETVPET- - - SNKTFEGERLCELMCSKGLRKYIYANI SDRAKLMEEI PSALKLAKPAKFLVLECIGK FYLOGR 204
Arabidopsis thaliana AHL43028 FRIGIDA - - - - - VVPET- - - SNKPEGERLCELMCSKGLRKYIYANI SDRAKLMEEI PSALKLAKPAKFLVLECIGK FYLOGR 201
Camelina sativa XP_010426308 FRIGIDA DKPEGGRLCDVPVAI- - - SDKSEGERLCEMSCSKGLRKYIYGNISDRAKLLEEIPALKLAKPAKFLVECIIGK FYLOGR 214
AFV28956 Capsella FRIGIDA - - - - - ETVPET- - - SNKPEGERLCELMCSKGLRKYIYGNISHRAKLMEEI PAALKLAKPAKFLVLECIGK FYLOGR 202

      260                280                300                320
Thlaspi arvense Ta1.0_26225 FRIGIDA  KAFANNNSPMI P ARKASLLILEGFLMLDLPGE EKNLKF IESSV KDEADAAAF A WKRRLMN EGG LA AEA AIDARGLLLL I 294
Eutrema salsugineum XP006402021 FRIGIDA KAFSHD- SHMI PARQVSLI LIEGFLLM IEPGEEK- VKSMI EESSV KDEAEAAAF A WKRRLMN EGG LA AEA AIDARGLLLL I 292
Bochera stricta AFJ66199 FRIGIDA RAFSKD- SPMI SARQVSLI LIESFLLMPDPGEGM- AKI I EESC I KDEAETA AVAWRKR LMGEG LAAAEKMDARG LLLL V 294
Arabidopsis arenosa AA292551 FRIGIDA RAFI K E- SPMV SARQVSLI LIESFLLMPDRGK G- - KVK I EESC I KDEAETA AVAWRKR LMGEG LAAAEKMDARG LLLL V 277
Arabidopsis lyrata ABY51887 FRIGIDA RAFI K E- SPMV SARQVSLI LIESFLLMPDRGK G- - KVK I EESC I KDEAETA AVAWRKR LMGEG LAAAEKMDARG LLLL V 280
Arabidopsis thaliana AHL43028 FRIGIDA RAFI K E- SPM S SARQVSLI LIESFLLMPDRGK G- - KVK I EESC I KDEAETA AVAWRKR LMGEG LAAAEKMDARG LLLL V 277
Camelina sativa XP_010426308 FRIGIDA RAFSKD- SPMI SARVSLI LIE SFLLMPDPGEGM- AKI K I EESSV KDEAETA AVAWRKR LMGEG LAAAEKMDARG LLLL I 292
AFV28956 Capsella FRIGIDA KAYSKD- SPMI SARQVSLI LIE SFLLMPDPGEGM- - K I K I EESSV KDEAETA AVAWRKR LMGEG LAAAEQ I DARGLLLL I 278

      340                360                380                400
Thlaspi arvense Ta1.0_26225 FRIGIDA  ACFGVPS SFGNTDLLDLRQSGAAE IAGALKRSPFLAT I VSGI VDSI KRGTQ I KALEM YVTFGLMEKD I FPPSS LLSF LR 374
Eutrema salsugineum XP006402021 FRIGIDA ACFGVPS FRSMDDL DL I R TSGSNEI AGALRRSPFLVPMI SGV VESSI KRGMH I EAL E M YVTFGMEDK I FSSS LLSF LR 372
Bochera stricta AFJ66199 FRIGIDA ACFGVPSNFRSMDDL DL I R TSGSNEI AGALRRSPFLVPMI SGV VESSI KRGMH I EAL E M YVTFGMEDK I FSA SVLTSFLR 374
Arabidopsis arenosa AA292551 FRIGIDA ACFGVPSNFRSMDDL DL I RMSGSNEI IAGALKRSPFLVPMI SGI VESSI KRGMH I EAL E M YVTFGMEDK I FSA SVLTSFLR 357
Arabidopsis lyrata ABY51887 FRIGIDA ACFGVPSNFRSMDDL DL I RMSGSNEI IAGALKRSPFLVPMI SGI VESSI KRGMH I EAL E M YVTFGMEDK I FSA SVLTSFLR 360
Arabidopsis thaliana AHL43028 FRIGIDA ACFGVPSNFRSD LLDL I RMSGSNEI IAGALKRSPFLVPMV SGI VESSI KRGMH I EAL E M YVTFGMEDK I FSA SVLTSFLK 357
Camelina sativa XP_010426308 FRIGIDA ACFGVPSNFRSMDDL DL I R TCGSNEI IAGALRRSFLPAMVSG I VESSI KRGMH I EAL E M YN FAMEDK I A LTVLTSFLK 372
AFV28956 Capsella FRIGIDA ACFGVPSNFRSMDDL DL I R TSGSNEI I V GALRRSPFLAPMI SGI VESSI KRGMH I EAL E M YVTFGMEDK I FSA SVLTSFLR 358

      420                440                460                480
Thlaspi arvense Ta1.0_26225 FRIGIDA  MSKESFEKAKRKTQSPMAFKKAI EKQLAALSSVMRCL ETHKLDPTKEA PGWQ I KEQVVKI KKDARQV DKOME EARS I SL 454
Eutrema salsugineum XP006402021 FRIGIDA KSKESFELAKRKAHSPTAFKEAI EKQLAALSVTKCLEAHKLDPAKEIPGWQ I KEEI IVKLEKDT LQLDKME EARS I SL 452
Bochera stricta AFJ66199 FRIGIDA MSKESFERAKRKAQSPLAFKFAETAEKQLGAFSSVMQCMETHKLDPAKEIPGWQ I KEEI AKLEN D I LQLDKME EARS I SL 454
Arabidopsis arenosa AA292551 FRIGIDA MSKESFERAKRKAQSPLAFKFAEKQALAEALSSVMQCMETHKLDPAKEIPGWQ I KEEI I V NLEKDT LQLDKME EARS I SL 437
Arabidopsis lyrata ABY51887 FRIGIDA MSKESFERAKRKAQSPLAFKFAA QKLAALSSVMQCMETHKLDPAKEIPGWQ I KEEI IVKLEKDT LQLDKME EARS I SL 440
Arabidopsis thaliana AHL43028 FRIGIDA MSKESFERAKRKAQSPLAFKFAEKQALAEALSSVMQCMETHKLDPAKEIPGWQ I KEEI IVSLEKDT LQLDKME EARS I SL 437
Camelina sativa XP_010426308 FRIGIDA MSKESFDRAKRKAHSPLAFKFAETAEKQI GSTLSSVMQCMETHKLDPAKEIPGWQ I KEEI IVKLEKDT LQLDKME EARS I SL 452
AFV28956 Capsella FRIGIDA MKKESFEREKQAQSPLAFKFAEKQALGALSSVMQCMETHKLDPAKEIPGWQ I KEEI IVKLENTV BQLNREMEEKARS I TL 438

      500                520                540                560
Thlaspi arvense Ta1.0_26225 FRIGIDA  MEEAELTKRLYSQQQMKRRL SDEMPTAPVA SSSYSP I YRDRNFPSHNRNEDRDE I SALVNSYLG P SSSFP HRS S L R 534
Eutrema salsugineum XP006402021 FRIGIDA MEEAVLT KRLYNQQ- MKRPRLSPMEMP- - PVA SSSYSP I YRDRNFP SH I ODRDE I SALVNSYLG P SSSFP HRS S L R 527
Bochera stricta AFJ66199 FRIGIDA MEEAVLT KRLYNQQ- MKRPRLSPMEMP- - PVA SSSYSP I YRDTF P S Q- RDEDRE I SALVNSYLG P S S F P HRS S L R 529
Arabidopsis arenosa AA292551 FRIGIDA MEEAVLAKRMYNQQ- MKRPRLSPMEMP- - PVA SSSYSP I YDRSFFSQ- RDEDRE I SALVNSYLG P S S F P HRS S L R 512
Arabidopsis lyrata ABY51887 FRIGIDA MEEAVLAKRMYNQQ- MKRPRLSPMEMP- - PVA SSSYSP I YDRSFFSQ- RDEDRE I SALVNSYLG P S S F P HRS S L R 515
Arabidopsis thaliana AHL43028 FRIGIDA MEEAVLAKRMYNQQ- MKRPRLSPMEMP- - PVT SSSYSP I YRDRSFFSQ- R D D D E I SALVNSYLG P S S F P HRS S L R 510
Camelina sativa XP_010426308 FRIGIDA MEEAVLT KRLYNQQ- MKRPRLSPMEMP- - PVA SSSYSP I YRDTF P S Q- RDEDRE I SALVNSYLG P S S F P HRS S L R 527
AFV28956 Capsella FRIGIDA MEEELLSKRLYNEQ- MKRPRLSPMEMP- - PVS SSSYSP I YRDTF P S Q- RDEDSE I SALVNSYLG P S S F P HRS S L R 513

      580                600                620                640
Thlaspi arvense Ta1.0_26225 FRIGIDA  SPEYMV P- - P- - - - - SYEQ L L S S Y T S- - - - - VQRRHSP- - VHQRLPREYSP- - - - - Q- I P YG IQRVYRHS P S V E 590
Eutrema salsugineum XP006402021 FRIGIDA SPEYMV P- - PGG LGRSVYAYEHLLPNSYSP SPNGQRLP RHYSP- - VHGQRHPROQSPP I HQGQQ- I P YG IQRVYRHS P S V E 590
Bochera stricta AFJ66199 FRIGIDA SPEYMV P- - PGG LGRSVYAYEHLLPNSYSP SPNGQRLP RHYSP- - VHGQRHPROQSPP I HQGQQ- I P YG IQRVYRHS P S V E 591
Arabidopsis arenosa AA292551 FRIGIDA SPEYMV P- - PGG LGRSVYAYEHLLPNSYSP SPNGQRLP RHYSP SPVHGQRHPROQSPP I HQGQQ- I P YG IQRVYRHS P S V E 604
Arabidopsis lyrata ABY51887 FRIGIDA SPEYI V P- - PGG LGRSVYAYEHLLPNSYSP SPNGQRLP RHYSP SPVHGQRHPROQSPP I HQGQQ- I P YG IQRVYRHS P S V E 594
Arabidopsis thaliana AHL43028 FRIGIDA SPEYMV P- - PGG LGRSVYAYEHLLPNSYSP SPNGQRLP RHYSP SPVHGQRHPROQSPP I HQGQQ- L P YG IQRVYRHS P S V E 589
Camelina sativa XP_010426308 FRIGIDA SPEYMV P- - PGG LGRSVYAYEHLLPNSYSP PANGQRHPROQSPP- - VHGQRHPROQSPP I HQGQQ- I P YG IQRVYRHS P S V E 603
AFV28956 Capsella FRIGIDA SPEYMV P- - PGG LGRSVYAYEHLLPNSYSP SPNGQRLA RQYSP- - VHGQRHPROQSPP I HQGQQ- I P YG IQRVYRHS P S V E 587

      660
Thlaspi arvense Ta1.0_26225 FRIGIDA  RYLG LPHHRSRPR-INSQD SRGGM  613
Eutrema salsugineum XP006402021 FRIGIDA RYLG LPHHRSRPR-INSQD I I GGM  612
Bochera stricta AFJ66199 FRIGIDA RYLG LSNHRSRPRNSSLDPT- - - - 624
Arabidopsis arenosa AA292551 FRIGIDA RYLG LSNHRSRPRNSSLDPK- - - - 611
Arabidopsis lyrata ABY51887 FRIGIDA RYLG LSNHRSRPRNSSLDPK- - - - 614
Arabidopsis thaliana AHL43028 FRIGIDA RYLG LSNHRSRPRNSSLDPK- - - - 609
Camelina sativa XP_010426308 FRIGIDA RYLG LSNHRSRPRNSSLDHT- - - - 623
AFV28956 Capsella FRIGIDA RYLG LSNHRSRPRNSSLDHT- - - - 607

```

**B**

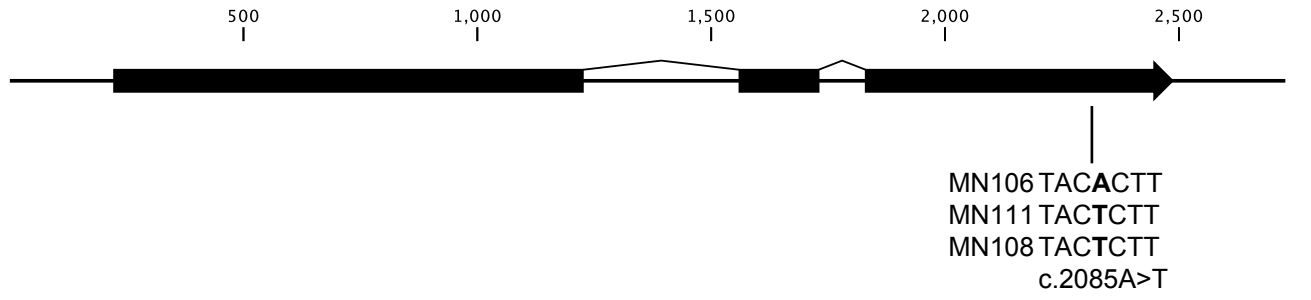

Supplement: PLD3-2-e00097-s004.pdf [file PLD3-2-e00097-s004.pdf]
