# Supplementary material for: Spring flowering habit in field pennycress (Thlaspi arvense) has arisen multiple independent times
Source: PubMed Central journal article supplement (PMC6508777; doi:10.1002/pld3.97), 2018-11-15

**A**

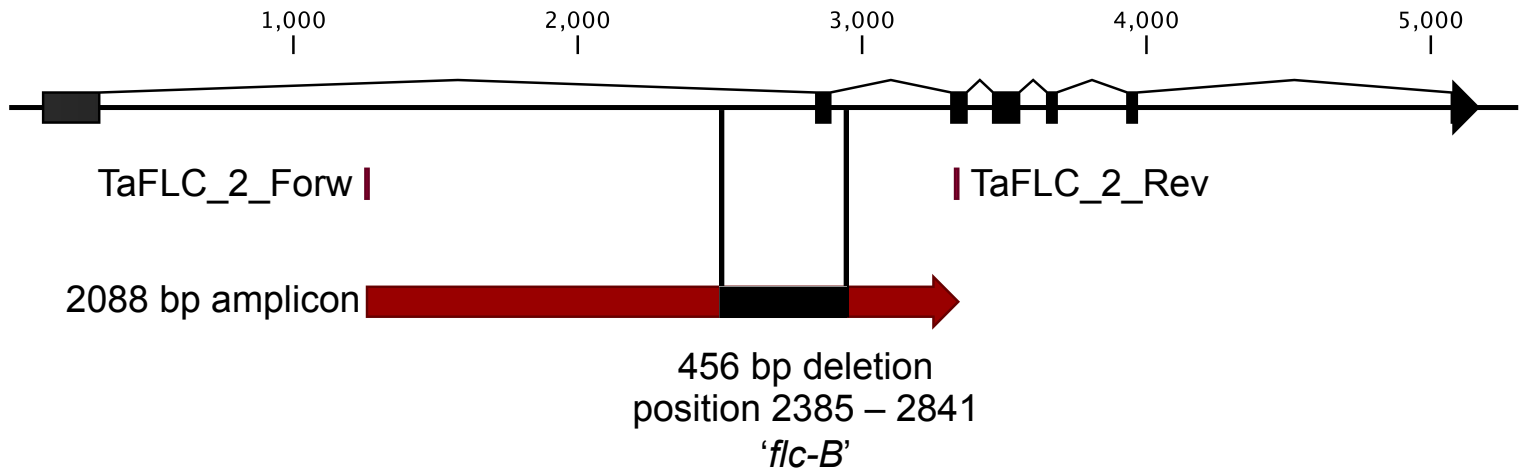

Supplement: PLD3-2-e00097-s001.pdf [file PLD3-2-e00097-s001.pdf]
