# Supplementary material for: Spring flowering habit in field pennycress (Thlaspi arvense) has arisen multiple independent times
Source: PubMed Central journal article supplement (PMC6508777; doi:10.1002/pld3.97), 2018-11-15
Supplement: PLD3-2-e00097-s005.pdf [file PLD3-2-e00097-s005.pdf]

**A**

|                                  |                                                                                  |     |  |     |  |     |     |     |
|----------------------------------|----------------------------------------------------------------------------------|-----|--|-----|--|-----|-----|-----|
|                                  |                                                                                  | 20  |  | 40  |  | 60  |     |     |
| Thlaspi arvense MN106 FLC        | MGRKKLEIKRIENKSSRQVTFSKRRNGLIEKARQLSVLCDA SVALLVVSASGKLYSFSSGDKYDFSSSGLVKILD     |     |  |     |  |     | 75  |     |
| Thlaspi arvense MN111 FLC        | MGRKKLEIKRIENKSSRQVTFSKRRNGLIEKARQLSVLCDA SVALLVVSASGKLYSFSSGDKYDFSSSGLVKILD     |     |  |     |  |     | 75  |     |
| Thlaspi arvense MN108 FLC        | MGEKKTNRNQAN-----                                                                |     |  |     |  |     | 11  |     |
| Arabidopsis thaliana FLC         | MGRKKLEIKRIENKSSRQVTFSKRRNGLIEKARQLSVLCDA SVALLVVSASGKLYSFSSGDN-----LVKILD       |     |  |     |  |     | 68  |     |
| Capsella rubella FLC AFV28913.1  | MGRKKLEIKRIENKSSRQVTFSKRRNGLIEKARQLSVLCDA SVALLVVSASGKLYSFSSGDN-----LVKILD       |     |  |     |  |     | 68  |     |
| Arabidopsis lyrata FLC ACFV33319 | MGRKKLEIKRIENKSSRQVTFSKRRNGLIEKARQLSVLCDA SVALLVVSASGKLYSFSSGDN-----LVKILD       |     |  |     |  |     | 68  |     |
| Camelina sativa FLC XP_010453038 | MGRKKLEIKRIENKSSRQVTFSKRRNGLIEKARQLSVLCDA SVALLVVSASGKLYSFSSGDN-----LVKILD       |     |  |     |  |     | 68  |     |
| Eutrema halophilum FLC AY957537  | MGRKKLEIKRIENKSSRQVTFSKRRNGLIEKARQLSVLCDA SVALLVVSASGKLYSFSSGDN-----LVKILD       |     |  |     |  |     | 68  |     |
| Brassica rapa FLC ABI29999       | MGRKKLEIKRIENKSSRQVTFSKRRNGLIEKARQLSVLCDA SVALLVVSASGKLYSFSSGDN-----LVKILD       |     |  |     |  |     | 68  |     |
| Brassica napus FLC AAK70215      | MGRKKLEIKRIENKSSRQVTFSKRRNGLIEKARQLSVLCDA SVALLVVSASGKLYSFSSGDN-----LVKILD       |     |  |     |  |     | 68  |     |
| Arabis alpina PEP1 ACQ44228      | MGRKKLEIKRIENKSSRQVTFSKRRNGLIEKARQLSVLCDA SVALLVVSASGKLYSFSSGDN-----LVKILD       |     |  |     |  |     | 68  |     |
|                                  |                                                                                  | 80  |  | 100 |  | 120 |     | 140 |
| Thlaspi arvense MN106 FLC        | RYGKQHADDLKALDLQSKALNYGSHHELLELVE SKLVESD VDNV SVD SLVQLEDHLETALSITRARKTELMLKLV  |     |  |     |  |     |     | 150 |
| Thlaspi arvense MN111 FLC        | RYGKQHADDLKALDLQSKALNYGSHHELLELVE RKLVESD VDNV SVD SLVQLEDHLETALSITRARKTELMLKLV  |     |  |     |  |     |     | 150 |
| Thlaspi arvense MN108 FLC        | -----                                                                            |     |  |     |  |     |     | 11  |
| Arabidopsis thaliana FLC         | RYGKQHADDLKALDHQSKALNYGSHYELLELDVSKLVGSNVKNVSI DALVQLEEHLLETALSVTRAKKTELMLKLV    |     |  |     |  |     |     | 143 |
| Capsella rubella FLC AFV28913.1  | RYGKQHADDLKALDLQSKALNYGSHHELLELVE SKLVESNVSNV SVD SLVQLEEHLLETALSVTRAKKTELMLKLV  |     |  |     |  |     |     | 143 |
| Arabidopsis lyrata FLC ACFV33319 | RYGKQHADDLKALDMQSKALNYGSHHELLELVE SKLVGSNVNNVSAETLLQLEKHLLETALSVTRAKKTELMLKLV    |     |  |     |  |     |     | 143 |
| Camelina sativa FLC XP_010453038 | RYGKQHADDLKALDLQSKALNYGSHHELLELVE SNLVESNVNNVSVDDLQLEEHLLETALSVTRAKKTELMLKLV     |     |  |     |  |     |     | 143 |
| Eutrema halophilum FLC AY957537  | RYGKQHADDLKALDLQSKALSYGSHHELLELVE SQLVDSVDNASSVDSLAQLEDHLETALSVTRARKTELMLKLV     |     |  |     |  |     |     | 143 |
| Brassica rapa FLC ABI29999       | RYGKQHDDD LKALDRQSKALDCGSHHELLELVE GKL EESNVDNV SVGSLVQLEEHLLETALSVTRARKTELMLKLV |     |  |     |  |     |     | 143 |
| Brassica napus FLC AAK70215      | RYGKQHDDD LKALDRQSKALDCGSHHELLELVE SKL EESNVDNV SVGSLVQLEEHLLETALSVTRARKTELMLKLV |     |  |     |  |     |     | 143 |
| Arabis alpina PEP1 ACQ44228      | RYGKRHADDLKALDLQSKALNYGSHHELLEI VESKLVAPNVNNV SFDTLVQLEKHLLETALAVVRAKKTELMLKLV   |     |  |     |  |     |     | 143 |
|                                  |                                                                                  | 160 |  | 180 |  | 200 |     |     |
| Thlaspi arvense MN106 FLC        | DSLKEKEKLLKEENQVLA SQMEKN-HMEADAD-NMEMSPGQISDMNLPVTLPLLN*                        |     |  |     |  |     | 204 |     |
| Thlaspi arvense MN111 FLC        | DSLKEKEKLLKEENQVLA SQMEKN-HMEADAD-NMEMSPGQISDMNLPVTLPLLN-                        |     |  |     |  |     | 203 |     |
| Thlaspi arvense MN108 FLC        | -----                                                                            |     |  |     |  |     | 11  |     |
| Arabidopsis thaliana FLC         | ENLKEKEKMLKEENQVLA SQMENNHHVGAEA--EMEMSPAGQISDNLPVTLPLLN-                        |     |  |     |  |     | 196 |     |
| Capsella rubella FLC AFV28913.1  | ENLKEKEKLLKEENQVLA SQMGKNHV VVGAETEMMEMSPAGQISDNLPVTLPLLN-                       |     |  |     |  |     | 198 |     |
| Arabidopsis lyrata FLC ACFV33319 | ENLKEKEKLLKEENQVLA SQMEKNHHVGAEA--EME I SPAGQISDNLPVTLPLLN-                      |     |  |     |  |     | 196 |     |
| Camelina sativa FLC XP_010453038 | ENLKEKEKLLKEENQVLA RQMETNH VVGAEADMEMEMSPAGQISDNLPVTLPLLN-                       |     |  |     |  |     | 198 |     |
| Eutrema halophilum FLC AY957537  | DSLKEKEKLLKRENQVLA SQMEKNQH VVGAEAD-NMEMSPGQISD SNLPVTLPLLN-                     |     |  |     |  |     | 197 |     |
| Brassica rapa FLC ABI29999       | ENLKEKEKLL EENHVLA SQMEKSNLVRAEAD-NMDVSPGQISD INLPVTLPLLKGGLVGVEFL               |     |  |     |  |     | 206 |     |
| Brassica napus FLC AAK70215      | ENLKEKEKLL EENHVLA SQMEKSNLVRAEAD-NMDVSPGQISD INLPVTLPLLN-                       |     |  |     |  |     | 197 |     |
| Arabis alpina PEP1 ACQ44228      | ESLKEKEKLLKEENQVLA SQMEKKT LVGAEADDNME I SPGEISD INLPVTLPLLN-                    |     |  |     |  |     | 198 |     |
