# Supplementary material for: Spring flowering habit in field pennycress (Thlaspi arvense) has arisen multiple independent times
Source: PubMed Central journal article supplement (PMC6508777; doi:10.1002/pld3.97), 2018-11-15
Supplement: PLD3-2-e00097-s007.pdf [file PLD3-2-e00097-s007.pdf]

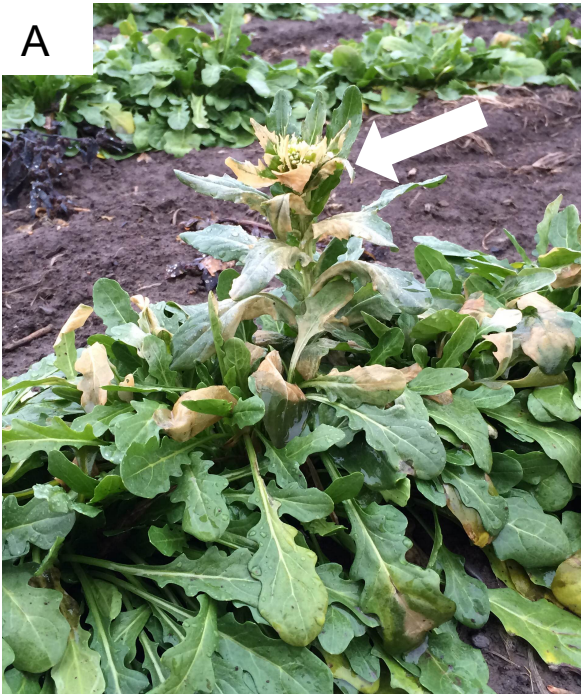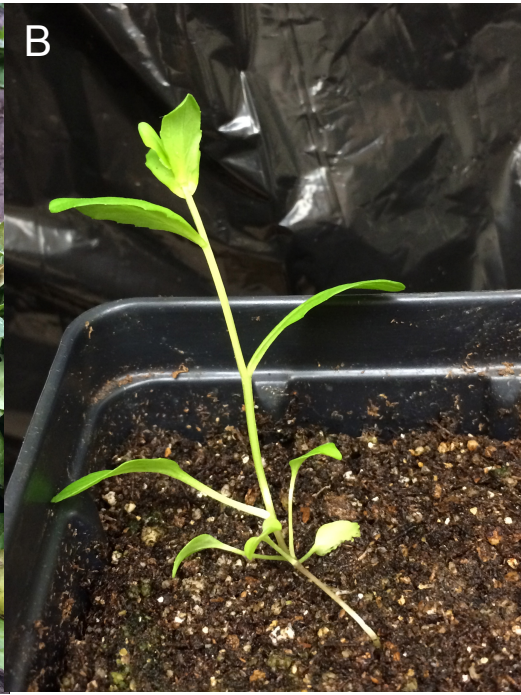

**C**

MN106 ATGGGGAGAAAAAACTAGAAATCAAGCGAATTGAGAACAAAAGTAGCCGACAAGTCACCTTCTCCAAACGACGCAACGGTCTCATCGAGAAAGCTCGTCAGCTT  
M G R K K L E I K R I E N K S S R Q V T F S K R R N G L I E K A R Q L

*flc-α* ATGGGGAGAAAAAACTAGAAATCAAGCGAATTGAGAACAAAAGTAGCCGATAA  
M G R K K L E I K R I E N K S S R \*
