# Supplementary material for: Spring flowering habit in field pennycress (Thlaspi arvense) has arisen multiple independent times
Source: PubMed Central journal article supplement (PMC6508777; doi:10.1002/pld3.97), 2018-11-15
Supplement: PLD3-2-e00097-s008.pdf [file PLD3-2-e00097-s008.pdf]

| <b>Accession</b>                            | <b>Read Length</b> | <b>Total bp (pre QC)</b> | <b>Total bp (post QC)</b> | <b>Number of Paired-End Reads (pre QC)</b> | <b>Number of Paired-End Reads (post QC)</b> |
|---------------------------------------------|--------------------|--------------------------|---------------------------|--------------------------------------------|---------------------------------------------|
| MN111                                       | 2x100 bp           | 33,778,738,556           | 27,043,767,076            | 167,221,478                                | 158,393,618                                 |
| MN108                                       | 2x100 bp           | 33,807,299,538           | 27,179,512,142            | 167,362,869                                | 159,141,481                                 |
| Ames22461                                   | 2x125 bp           | 17,321,171,868           | 15,290,002,168            | 68,734,809                                 | 66,483,245                                  |
| PI633414                                    | 2x125 bp           | 19,449,317,664           | 17,133,004,749            | 77,179,832                                 | 74,538,343                                  |
| PI633415                                    | 2x125 bp           | 18,915,382,080           | 16,469,793,673            | 75,061,040                                 | 71,747,344                                  |
| PI650284                                    | 2x125 bp           | 17,580,974,544           | 15,158,595,197            | 69,765,772                                 | 66,056,660                                  |
| PI650287                                    | 2x125 bp           | 16,589,921,544           | 14,661,876,555            | 65,833,022                                 | 63,751,658                                  |
| f1c- $\alpha$ (c.52C>T in MN106 background) | 2x125 bp           | 17,220,139,020           | 15,027,555,931            | 68,333,885                                 | 65,449,912                                  |
