# Supplementary material for: Spring flowering habit in field pennycress (Thlaspi arvense) has arisen multiple independent times
Source: PubMed Central journal article supplement (PMC6508777; doi:10.1002/pld3.97), 2018-11-15
Supplement: PLD3-2-e00097-s009.pdf [file PLD3-2-e00097-s009.pdf]

| <b>Name of oligo</b> | <b>Sequence (5' - 3')</b>   |
|----------------------|-----------------------------|
| TaFLC_1_Forw         | CCGAGGAAGAAAAAGTAGATAGAGACA |
| TaFLC_1_Rev          | GAAGCTTAAAGGGGGAAAAAGGAA    |
| TaFLC_2_Rev          | CGAACCATAGTTCAGAGCTT        |
| TaFLC_2_Forw         | ATAGTGTGCATCAACTGGTC        |
| TaFLC_3_Rev          | GCTAATTTTTCAGCAAATCTCCCG    |
| TaFLC_4_Forw         | GCGACGGTGAATATGGAGTTGG      |
