# Supplementary material for: Spring flowering habit in field pennycress (Thlaspi arvense) has arisen multiple independent times
Source: PubMed Central journal article supplement (PMC6508777; doi:10.1002/pld3.97), 2018-11-15
Supplement: PLD3-2-e00097-s010.pdf [file PLD3-2-e00097-s010.pdf]

| <b>Name</b> | <b>Allele</b> | <b>Growth Habit</b> | <b>Source Location</b>                       |
|-------------|---------------|---------------------|----------------------------------------------|
| MN106ref    | WT            | WA                  | Minnesota                                    |
| MN111       | WT            | WA                  | New York                                     |
| MN108SA     | <i>flc-A</i>  | SA                  | Minnesota                                    |
| Ames31489   | <i>flc-A</i>  | SA                  | Saskatoon, Canada                            |
| MN131       | <i>flc-A</i>  | SA                  | Howard Springs, MT                           |
| Ames31491   | <i>flc-A</i>  | SA                  | Canada                                       |
| Ames29512   | <i>flc-B</i>  | SA                  | Ohio (USDA line - plotted in middle of Ohio) |
| Ames31024   | <i>flc-B</i>  | SA                  | Colorado                                     |
| Ames31490   | <i>flc-B</i>  | SA                  | Saskatoon, Canada                            |
| Ames31492   | <i>flc-B</i>  | SA                  | Saskatoon, Canada                            |
| Ames31500   | <i>flc-B</i>  | SA                  | Alberta, Canada                              |
| MN121       | <i>flc-B</i>  | SA                  | Roseau, MN                                   |
| MN123       | <i>flc-B</i>  | SA                  | Roseau, MN                                   |
| MN124       | <i>flc-B</i>  | SA                  | Roseau, MN                                   |
| MN125       | <i>flc-B</i>  | SA                  | Roseau, MN                                   |
| MN129       | <i>flc-C</i>  | SA                  | Howard Springs, MT                           |
| MN133       | <i>flc-C</i>  | SA                  | Howard Springs, MT                           |
| MN134       | <i>flc-C</i>  | SA                  | Howard Springs, MT                           |
| MN135       | <i>flc-C</i>  | SA                  | Howard Springs, MT                           |
| Ames22461   | <i>flc-C</i>  | SA                  | Slawinek, Lublin, Poland                     |
| PI633415    | <i>flc-C</i>  | SA                  | Belgern, Germany                             |
| PI650284    | <i>flc-C</i>  | SA                  | Kefferhausen, Germany                        |
| PI650285    | <i>flc-C</i>  | SA                  | Leipzig-Mockau, Saxony, Germany              |
| PI650286    | <i>flc-C</i>  | SA                  | Groitzsch, Saxony, Germany                   |
| PI650287    | <i>flc-C</i>  | SA                  | Molsheim, Bas-Rhin, France                   |
| PI633414    | <i>flc-D</i>  | SA                  | Wachstedt, Germany                           |
