# Supplementary material for: Spring flowering habit in field pennycress (Thlaspi arvense) has arisen multiple independent times
Source: Plant Direct. 2018 Nov 15;2(11):e00097. doi: 10.1002/pld3.97 (PMC6508777; doi:10.1002/pld3.97)
Supplement: Supplementary file 6 [file PLD3-2-e00097-s006.pdf]

|                                 |                                                                                                                                                                                                                     |      |
|---------------------------------|---------------------------------------------------------------------------------------------------------------------------------------------------------------------------------------------------------------------|------|
| Ths1psi-arsenine MN106 FLC cDNA | TTTTTTTAAATGAATGATATATATTCAGTGAACCTGGACCTGAAACACACAAACACAAAGAGGTTGTGACACAGTTTAAATCTGACGATGTGTATAGTCTAAAGTTGTGATATTGTGATATATTTTCGTGAAAAATAAATTCCTGTTCGCGTATATATAGTGTAGTGTGTTTGTGTGAGATTATGGAACAGCATTTGGGT            | 4599 |
| Ths1psi-arsenine MN108 FLC cDNA | TTTTTTTAAATGAATGATATATTCAGTGAACCTGGACCTGAAACACACAAACACAAAGAGGTTGTGACACAGTTTAAATCTGACGATGTGTATAGTCTAAAGTTGTGATATTGTGATATATTTTCGTGAAAAATAAATTCCTGTTCGCGTATATATAGTGTAGTGTGTTTGTGTGAGATTATGGAACAGCATTTGGGT              | 4599 |
| Ths1psi-arsenine MN106 FLC cDNA | TGTTAGTTATGCTTTAGGTGCATGTTTCTTAACTAGTTTCAGGTTGATGAATAAACCGGGAACACCTAGACAGCGTACATGCTTGTGGAGAGGATACATAGTGTTTTTTATAAAAAAAAATTTGGGTGCTAAACATGCTCTTTAAAGCTGGAAGAACCTTAAAGTCCGATCGTCAAAAGACAGCGGAAATTTGTAAACGCAAGCATGCTAT | 4799 |
| Ths1psi-arsenine MN108 FLC cDNA | TGTTAGTTATGCTTTAGGTGCATGTTTCTTAACTAGTTTCAGGTTGATGAATAAACCGGGAACACCTAGACAGCGTACATGCTTGTGGAGAGGATACATAGTGTTTTTTATAAAAAAAAATTTGGGTGCTAAACATGCTCTTTAAAGCTGGAAGAACCTTAAAGTCCGATCGTCAAAAGACAGCGGAAATTTGTAAACGCAAGCATGCTAT | 4799 |
| Ths1psi-arsenine MN106 FLC cDNA | ATATTTTGATGGTGGTTAGTTTATAATCGGTGGTGAGGTAAGAAGATCATATATATCTTGGGGTAAATTAATAAAGGGATAAAATATAGTGACAAGAAAGGTGAGAGAAATGAAGTAATCGAATTTGGTTTGGACCTATATATAATTTATCTTCACAGTGGAGAGAAATCATATGGAAGCAGCATGCTGATAAATGGAAGT           | 4999 |
| Ths1psi-arsenine MN111 FLC cDNA | ATATTTTGATGGTGGTTAGTTTATAATCGGTGGTGAGGTAAGAAGATCATATATATCTTGGGGTAAATTAATAAAGGGATAAAATAGTGACAAGAAAGGTGAGAGAAATGAAGTAATCGAATTTGGTTTGGACCTATATATAATTTATCTTCACAGTGGAGAGAAATCATATGGAAGCAGCATGCTGATAAATGGAAGT             | 4999 |
| Ths1psi-arsenine MN106 FLC cDNA | TCAACCTGGACAAATCTCCGACATGAATCTCCGGTAACTCTCCGGTGGCTTAATTAAG                                                                                                                                                          | 5056 |
| Ths1psi-arsenine MN111 FLC cDNA | TCAACCTGGACAAATCTCCGACATGAATCTCCGGTAACTCTCCGGTGGCTTAATTAAG                                                                                                                                                          | 5056 |
| Ths1psi-arsenine MN108 FLC cDNA | TCAACCTGGACAAATCTCCGACATGAATCTCCGGTAACTCTCCGGTGGCTTAATTAAG                                                                                                                                                          | 5057 |
